# Supplementary material for: RNA Sequencing in Comparison to Immunohistochemistry for Measuring Cancer Biomarkers in Breast Cancer and Lung Cancer Specimens
Source: Biomedicines. 2020 May 9;8(5):114. doi: 10.3390/biomedicines8050114 (PMC7277916; doi:10.3390/biomedicines8050114)
Supplement: Supplementary file 1 [file biomedicines-08-00114-s001.xlsx]

## Sheet: HER2
Case ID	HER2
TCGA-AC-A2B8	Negative
TCGA-E2-A10A	Positive
TCGA-AR-A1AV	Negative
TCGA-BH-A0HX	Negative
TCGA-AQ-A0Y5	Positive
TCGA-E2-A1B4	Negative
TCGA-E2-A152	Positive
TCGA-EW-A1J5	Negative
TCGA-D8-A73X	Negative
TCGA-AR-A5QN	Positive
TCGA-A8-A090	Positive
TCGA-BH-A1F2	Positive
TCGA-D8-A1Y0	Negative
TCGA-AR-A0U2	Negative
TCGA-A7-A2KD	Positive
TCGA-BH-A18H	Positive
TCGA-A7-A0DB	Negative
TCGA-E9-A22B	Negative
TCGA-A7-A4SA	Negative
TCGA-AC-A4ZE	Positive
TCGA-BH-A18K	Negative
TCGA-BH-A0C1	Negative
TCGA-D8-A73W	Negative
TCGA-A2-A1G4	Negative
TCGA-AO-A12C	Positive
TCGA-AR-A0U3	Negative
TCGA-AR-A24M	Negative
TCGA-A8-A0A6	Negative
TCGA-AR-A24O	Negative
TCGA-A1-A0SB	Negative
TCGA-E2-A14X	Negative
TCGA-WT-AB44	Negative
TCGA-BH-A0HP	Negative
TCGA-E9-A1N5	Positive
TCGA-A8-A07I	Positive
TCGA-A1-A0SN	Positive
TCGA-A8-A09N	Positive
TCGA-EW-A1IZ	Negative
TCGA-JL-A3YX	Positive
TCGA-E2-A154	Negative
TCGA-AO-A125	Negative
TCGA-A2-A04Y	Negative
TCGA-AR-A24V	Negative
TCGA-AR-A24Q	Negative
TCGA-D8-A27E	Negative
TCGA-D8-A4Z1	Negative
TCGA-AO-A12A	Negative
TCGA-AN-A03X	Positive
TCGA-EW-A1IW	Positive
TCGA-E9-A1NF	Negative
TCGA-AO-A0JI	Negative
TCGA-A8-A09E	Positive
TCGA-EW-A1PC	Negative
TCGA-AC-A5XU	Negative
TCGA-BH-A0BD	Negative
TCGA-AN-A0FK	Positive
TCGA-A2-A3Y0	Negative
TCGA-A8-A08G	Positive
TCGA-C8-A135	Positive
TCGA-BH-A0H6	Negative
TCGA-D8-A1JJ	Negative
TCGA-AN-A0FS	Positive
TCGA-A8-A09W	Negative
TCGA-BH-A0DG	Negative
TCGA-AR-A1AL	Negative
TCGA-C8-A273	Negative
TCGA-BH-A0B7	Positive
TCGA-5L-AAT0	Negative
TCGA-AN-A0AS	Negative
TCGA-AN-A04C	Positive
TCGA-LL-A7SZ	Negative
TCGA-3C-AALI	Positive
TCGA-A7-A6VX	Negative
TCGA-AO-A03R	Negative
TCGA-EW-A1J3	Positive
TCGA-AN-A0FV	Positive
TCGA-A7-A56D	Negative
TCGA-PE-A5DC	Positive
TCGA-B6-A400	Negative
TCGA-BH-A18J	Negative
TCGA-D8-A1XW	Negative
TCGA-E2-A14Q	Negative
TCGA-A8-A06X	Positive
TCGA-A8-A09X	Negative
TCGA-A7-A3RF	Negative
TCGA-A8-A08P	Positive
TCGA-A7-A4SB	Negative
TCGA-A1-A0SD	Negative
TCGA-AN-A0AJ	Positive
TCGA-A8-A06Q	Negative
TCGA-D8-A1JS	Negative
TCGA-A8-A091	Negative
TCGA-D8-A27I	Negative
TCGA-E2-A156	Negative
TCGA-AN-A0XL	Negative
TCGA-BH-A0E2	Negative
TCGA-A2-A0CY	Negative
TCGA-C8-A12M	Negative
TCGA-D8-A1XU	Negative
TCGA-AN-A049	Negative
TCGA-E9-A54X	Negative
TCGA-GM-A2DM	Negative
TCGA-BH-A0DV	Negative
TCGA-LL-A5YP	Negative
TCGA-A8-A085	Negative
TCGA-A2-A0EO	Negative
TCGA-A2-A3KD	Negative
TCGA-A2-A25D	Negative
TCGA-AC-A8OR	Negative
TCGA-C8-A1HM	Negative
TCGA-EW-A1IY	Negative
TCGA-AO-A03O	Negative
TCGA-A7-A5ZX	Negative
TCGA-E2-A1B0	Positive
TCGA-EW-A1J2	Negative
TCGA-C8-A1HG	Negative
TCGA-A8-A06O	Negative
TCGA-A2-A0SU	Negative
TCGA-E2-A15F	Negative
TCGA-BH-A0AY	Negative
TCGA-A2-A0CV	Negative
TCGA-BH-A1ET	Negative
TCGA-A8-A075	Positive
TCGA-AC-A62Y	Negative
TCGA-A8-A07S	Negative
TCGA-A7-A3IY	Negative
TCGA-A8-A0AD	Negative
TCGA-BH-A1FG	Negative
TCGA-C8-A12N	Negative
TCGA-A8-A08I	Negative
TCGA-A2-A0YH	Negative
TCGA-D8-A27P	Negative
TCGA-BH-A1EN	Positive
TCGA-A2-A4RW	Negative
TCGA-E2-A14T	Negative
TCGA-A2-A0EY	Positive
TCGA-D8-A1XS	Positive
TCGA-AR-A254	Positive
TCGA-A2-A0YJ	Negative
TCGA-BH-A1FD	Negative
TCGA-AO-A0J8	Negative
TCGA-A2-A0T7	Negative
TCGA-EW-A6SC	Negative
TCGA-BH-A0BP	Negative
TCGA-A2-A4RY	Negative
TCGA-BH-A0E9	Negative
TCGA-AN-A0XR	Negative
TCGA-AN-A0AK	Positive
TCGA-AR-A1AT	Positive
TCGA-BH-A0BV	Negative
TCGA-D8-A27T	Negative
TCGA-C8-A274	Negative
TCGA-AC-A23H	Positive
TCGA-A8-A086	Negative
TCGA-A8-A07L	Negative
TCGA-A2-A259	Negative
TCGA-AO-A03V	Negative
TCGA-E2-A1L6	Negative
TCGA-BH-A0DQ	Negative
TCGA-AN-A0XV	Positive
TCGA-EW-A1OY	Negative
TCGA-A8-A09D	Negative
TCGA-D8-A13Y	Negative
TCGA-BH-A1F5	Negative
TCGA-AC-A5EH	Negative
TCGA-BH-A18U	Positive
TCGA-AR-A0TX	Positive
TCGA-BH-A0DS	Negative
TCGA-D8-A27K	Negative
TCGA-A2-A0EX	Negative
TCGA-E9-A3X8	Positive
TCGA-A8-A08C	Positive
TCGA-D8-A1JK	Negative
TCGA-D8-A1X7	Negative
TCGA-D8-A1X5	Positive
TCGA-A2-A3XW	Negative
TCGA-W8-A86G	Negative
TCGA-D8-A1JD	Negative
TCGA-BH-A0DX	Negative
TCGA-BH-A0B0	Negative
TCGA-EW-A6S9	Positive
TCGA-D8-A3Z5	Negative
TCGA-E2-A15A	Negative
TCGA-A2-A0EW	Negative
TCGA-A8-A07P	Positive
TCGA-BH-A42T	Positive
TCGA-BH-A0DI	Negative
TCGA-A8-A08X	Positive
TCGA-EW-A424	Positive
TCGA-E2-A1IG	Negative
TCGA-BH-A0GY	Negative
TCGA-A8-A07B	Positive
TCGA-BH-A0BO	Negative
TCGA-D8-A1XY	Positive
TCGA-BH-A0DH	Negative
TCGA-BH-A0BJ	Negative
TCGA-A8-A092	Negative
TCGA-D8-A1XT	Positive
TCGA-B6-A40B	Negative
TCGA-A2-A0D3	Negative
TCGA-LD-A74U	Negative
TCGA-LL-A6FQ	Negative
TCGA-BH-A0BC	Negative
TCGA-AO-A12E	Negative
TCGA-AO-A0JB	Negative
TCGA-A8-A082	Negative
TCGA-E9-A1N6	Positive
TCGA-A8-A09Z	Negative
TCGA-AN-A0FT	Positive
TCGA-A2-A3XZ	Positive
TCGA-C8-A1HI	Negative
TCGA-C8-A8HP	Positive
TCGA-AO-A0JG	Negative
TCGA-BH-A202	Positive
TCGA-S3-AA12	Negative
TCGA-C8-A137	Positive
TCGA-BH-A0DE	Negative
TCGA-D8-A1X8	Negative
TCGA-A8-A08A	Negative
TCGA-E2-A10C	Negative
TCGA-D8-A1JE	Negative
TCGA-A2-A0YL	Negative
TCGA-BH-A0BR	Negative
TCGA-BH-A0W4	Negative
TCGA-BH-A0BQ	Positive
TCGA-A8-A09V	Negative
TCGA-B6-A401	Negative
TCGA-BH-A0HK	Negative
TCGA-BH-A0DP	Negative
TCGA-LL-A8F5	Negative
TCGA-A2-A0EU	Negative
TCGA-E2-A1IU	Negative
TCGA-AO-A0JM	Positive
TCGA-D8-A1JH	Negative
TCGA-D8-A1XD	Negative
TCGA-AO-A126	Negative
TCGA-BH-A0DD	Positive
TCGA-3C-AALK	Positive
TCGA-BH-A1F8	Positive
TCGA-AC-A3EH	Negative
TCGA-AC-A23C	Positive
TCGA-A8-A08L	Negative
TCGA-GM-A2DL	Negative
TCGA-A8-A084	Negative
TCGA-A2-A04X	Positive
TCGA-E2-A1LE	Positive
TCGA-A8-A083	Negative
TCGA-BH-A18P	Positive
TCGA-D8-A1XJ	Positive
TCGA-C8-A26V	Negative
TCGA-A8-A09M	Negative
TCGA-BH-A201	Negative
TCGA-BH-A0HU	Negative
TCGA-AO-A12H	Negative
TCGA-AR-A2LN	Negative
TCGA-LD-A7W6	Negative
TCGA-BH-A0HF	Negative
TCGA-A8-A09K	Negative
TCGA-A8-A07W	Negative
TCGA-BH-A18F	Negative
TCGA-A7-A0D9	Negative
TCGA-BH-A42V	Negative
TCGA-A8-A09T	Negative
TCGA-LL-A9Q3	Positive
TCGA-AC-A3HN	Negative
TCGA-LL-A5YL	Positive
TCGA-AR-A0TY	Negative
TCGA-A8-A06Z	Negative
TCGA-A2-A0CZ	Negative
TCGA-BH-AB28	Negative
TCGA-AO-A03L	Positive
TCGA-A1-A0SG	Negative
TCGA-C8-A3M8	Positive
TCGA-EW-A2FS	Negative
TCGA-AN-A0FW	Negative
TCGA-AC-A7VC	Negative
TCGA-BH-A0B5	Negative
TCGA-EW-A6SA	Negative
TCGA-A8-A09Q	Negative
TCGA-BH-A0AZ	Negative
TCGA-AO-A0J7	Negative
TCGA-AN-A0AM	Negative
TCGA-E2-A1II	Negative
TCGA-GI-A2C8	Negative
TCGA-AR-A24R	Negative
TCGA-A7-A26E	Negative
TCGA-B6-A1KC	Negative
TCGA-D8-A1JM	Negative
TCGA-BH-A18M	Positive
TCGA-A8-A099	Positive
TCGA-E2-A14P	Positive
TCGA-BH-A5IZ	Negative
TCGA-AN-A0XP	Positive
TCGA-A2-A0D1	Positive
TCGA-A2-A0YF	Negative
TCGA-A8-A094	Negative
TCGA-A7-A26J	Negative
TCGA-AO-A1KQ	Negative
TCGA-A8-A0AB	Positive
TCGA-A2-A1FV	Negative
TCGA-A1-A0SE	Negative
TCGA-A8-A095	Negative
TCGA-D8-A1Y1	Negative
TCGA-EW-A1IX	Negative
TCGA-A2-A0T5	Negative
TCGA-EW-A2FW	Negative
TCGA-D8-A1XB	Negative
TCGA-D8-A27V	Negative
TCGA-S3-AA14	Positive
TCGA-D8-A1XM	Negative
TCGA-C8-A12Q	Positive
TCGA-A8-A09B	Negative
TCGA-AR-A1AK	Negative
TCGA-E2-A1IK	Negative
TCGA-GM-A2DK	Negative
TCGA-S3-A6ZG	Negative
TCGA-E2-A155	Negative
TCGA-A1-A0SM	Positive
TCGA-HN-A2OB	Negative
TCGA-A8-A08Z	Negative
TCGA-D8-A1XO	Negative
TCGA-AO-A03T	Negative
TCGA-BH-A0DO	Negative
TCGA-A8-A08F	Negative
TCGA-E2-A1IN	Negative
TCGA-E9-A227	Negative
TCGA-A8-A081	Negative
TCGA-AN-A0FZ	Positive
TCGA-AC-A3W7	Negative
TCGA-D8-A1XG	Negative
TCGA-AO-A12B	Negative
TCGA-BH-A0HO	Negative
TCGA-E9-A6HE	Negative
TCGA-E2-A1LB	Positive
TCGA-A8-A08S	Positive
TCGA-AN-A0FY	Negative
TCGA-A8-A06R	Positive
TCGA-D8-A1JI	Negative
TCGA-A7-A26J	Negative
TCGA-A2-A0D4	Negative
TCGA-LD-A66U	Negative
TCGA-D8-A146	Negative
TCGA-GM-A3XN	Negative
TCGA-E9-A1N9	Positive
TCGA-A7-A3J0	Negative
TCGA-BH-A0DZ	Positive
TCGA-BH-A0B1	Negative
TCGA-EW-A1PE	Negative
TCGA-BH-A0HY	Positive
TCGA-AO-A0JF	Negative
TCGA-AO-A03P	Negative
TCGA-A2-A4S0	Negative
TCGA-EW-A1P6	Negative
TCGA-BH-A0BA	Negative
TCGA-UU-A93S	Positive
TCGA-A8-A07F	Negative
TCGA-E2-A1IF	Negative
TCGA-A2-A0YG	Positive
TCGA-GM-A3XG	Negative
TCGA-A7-A4SF	Positive
TCGA-AO-A1KO	Negative
TCGA-A8-A06U	Positive
TCGA-A8-A0A9	Negative
TCGA-A2-A1FZ	Negative
TCGA-E2-A1IL	Negative
TCGA-EW-A2FV	Negative
TCGA-OK-A5Q2	Negative
TCGA-AR-A2LQ	Negative
TCGA-AC-A5XS	Negative
TCGA-AR-A1AN	Negative
TCGA-AC-A2FO	Negative
TCGA-A8-A09I	Positive
TCGA-GM-A5PX	Negative
TCGA-BH-A1EV	Positive
TCGA-E2-A1L9	Negative
TCGA-A8-A07G	Negative
TCGA-D8-A1XR	Negative
TCGA-AC-A3TN	Positive
TCGA-A7-A3J1	Negative
TCGA-A8-A08J	Negative
TCGA-AN-A041	Positive
TCGA-A2-A0EV	Negative
TCGA-D8-A1JP	Negative
TCGA-BH-A1ES	Negative
TCGA-A7-A0DB	Negative
TCGA-EW-A1PA	Negative
TCGA-AR-A1AS	Negative
TCGA-MS-A51U	Negative
TCGA-EW-A6SB	Negative
TCGA-AC-A8OS	Positive
TCGA-BH-A18N	Negative
TCGA-C8-A27A	Negative
TCGA-A8-A07E	Negative
TCGA-A2-A4S2	Negative
TCGA-A8-A07Z	Negative
TCGA-EW-A1P0	Negative
TCGA-C8-A1HF	Positive
TCGA-BH-A18I	Positive
TCGA-Z7-A8R6	Negative
TCGA-BH-A18S	Negative
TCGA-AO-A1KP	Negative
TCGA-AN-A046	Negative
TCGA-AN-A0XO	Negative
TCGA-BH-A0DT	Negative
TCGA-AC-A3YI	Positive
TCGA-A7-A26E	Negative
TCGA-AO-A03N	Negative
TCGA-A8-A06T	Positive
TCGA-A1-A0SI	Negative
TCGA-BH-A0H0	Negative
TCGA-C8-A8HQ	Negative
TCGA-A1-A0SF	Negative
TCGA-B6-A40C	Negative
TCGA-E2-A15A	Negative
TCGA-D8-A1J9	Positive
TCGA-A8-A08T	Positive
TCGA-E2-A1BC	Negative
TCGA-A2-A4S3	Negative
TCGA-A2-A0CK	Negative
TCGA-A8-A0A2	Negative
TCGA-E2-A15G	Negative
TCGA-D8-A1JC	Negative
TCGA-A8-A097	Positive
TCGA-A8-A079	Negative
TCGA-BH-A0DL	Negative
TCGA-AN-A0XS	Negative
TCGA-AO-A0JL	Negative
TCGA-D8-A1XC	Negative
TCGA-A8-A08B	Positive
TCGA-C8-A12W	Negative
TCGA-A7-A0CJ	Negative
TCGA-E2-A14V	Positive
TCGA-AR-A255	Positive
TCGA-A8-A08O	Negative
TCGA-AQ-A54O	Negative
TCGA-AR-A24Z	Negative
TCGA-BH-A0HQ	Negative
TCGA-D8-A1JA	Positive
TCGA-AN-A04A	Negative
TCGA-EW-A1J1	Negative
TCGA-C8-A1HK	Positive
TCGA-BH-A0HI	Negative
TCGA-BH-A28Q	Negative
TCGA-EW-A3E8	Negative
TCGA-E9-A1N4	Positive
TCGA-EW-A1PF	Negative
TCGA-E9-A1NC	Positive
TCGA-A8-A0A4	Negative
TCGA-A8-A06P	Negative
TCGA-E2-A15P	Negative
TCGA-A8-A06N	Negative
TCGA-PE-A5DD	Positive
TCGA-D8-A1XZ	Negative
TCGA-BH-A1EX	Positive
TCGA-C8-A12T	Positive
TCGA-E9-A1NI	Negative
TCGA-A7-A5ZW	Negative
TCGA-A8-A06Y	Negative
TCGA-EW-A1J6	Negative
TCGA-GM-A3NY	Negative
TCGA-BH-A0EA	Negative
TCGA-C8-A12Z	Positive
TCGA-BH-A0H7	Negative
TCGA-C8-A12P	Positive
TCGA-D8-A1X6	Negative
TCGA-E9-A1NH	Negative
TCGA-BH-A8FY	Negative
TCGA-AR-A24W	Negative
TCGA-BH-A0AU	Positive
TCGA-BH-A0E7	Negative
TCGA-AO-A03M	Negative
TCGA-D8-A27L	Negative
TCGA-A7-A426	Negative
TCGA-A8-A09G	Positive
TCGA-C8-A12X	Negative
TCGA-A2-A04W	Positive
TCGA-BH-A1ES	Negative
TCGA-OL-A6VR	Negative
TCGA-A7-A0CG	Negative
TCGA-AN-A0XT	Negative
TCGA-A1-A0SQ	Negative
TCGA-BH-A0EI	Negative
TCGA-D8-A27N	Positive
TCGA-EW-A1OX	Negative
TCGA-BH-A18L	Negative
TCGA-BH-A0BM	Negative
TCGA-EW-A1P3	Negative
TCGA-AC-A6NO	Negative
TCGA-E9-A295	Positive
TCGA-A8-A09R	Negative
TCGA-A8-A093	Negative
TCGA-BH-A18R	Positive
TCGA-D8-A1XF	Negative
TCGA-D8-A140	Positive
TCGA-AR-A24H	Negative
TCGA-C8-A12U	Negative
TCGA-E9-A22H	Positive
TCGA-AO-A0JD	Negative
TCGA-EW-A1P5	Negative
TCGA-A8-A076	Positive
TCGA-E2-A14Z	Negative
TCGA-A2-A25C	Negative
TCGA-BH-A0BT	Negative
TCGA-AN-A0FD	Positive
TCGA-A2-A4RX	Negative
TCGA-BH-A28O	Negative
TCGA-E9-A1NA	Positive
TCGA-BH-A0C3	Negative
TCGA-A2-A0ES	Negative
TCGA-EW-A423	Negative
TCGA-C8-A12O	Negative
TCGA-AQ-A1H3	Negative
TCGA-GM-A2DN	Negative
TCGA-D8-A1J8	Negative
TCGA-AQ-A04L	Positive
TCGA-AO-A0JA	Negative
TCGA-C8-A26Z	Negative
TCGA-D8-A3Z6	Negative
TCGA-BH-A0EE	Positive
TCGA-C8-A1HO	Negative
TCGA-A2-A0CX	Positive
TCGA-AN-A0FF	Negative
TCGA-AC-A2QI	Negative
TCGA-A2-A1FW	Negative
TCGA-E2-A153	Negative
TCGA-Z7-A8R5	Negative
TCGA-UL-AAZ6	Positive
TCGA-AO-A12G	Positive
TCGA-LL-A7T0	Positive
TCGA-3C-AAAU	Negative
TCGA-AN-A03Y	Negative
TCGA-A8-A09A	Negative
TCGA-EW-A1PH	Negative
TCGA-BH-A42U	Negative
TCGA-A7-A6VV	Negative
TCGA-BH-A0B9	Negative
TCGA-A8-A07R	Positive
TCGA-AN-A0AT	Negative
TCGA-A2-A3XX	Negative
TCGA-A1-A0SP	Negative
TCGA-AO-A1KR	Negative
TCGA-AQ-A04J	Negative
TCGA-AR-A0TP	Negative
TCGA-A2-A0T0	Negative
TCGA-A2-A3XY	Negative
TCGA-BH-A0BG	Negative
TCGA-C8-A26Y	Negative
TCGA-AR-A1AH	Negative
TCGA-A2-A1G6	Negative
TCGA-A8-A08R	Negative
TCGA-AR-A256	Negative
TCGA-C8-A27B	Negative
TCGA-A2-A04U	Negative
TCGA-LL-A73Y	Negative
TCGA-A2-A0CM	Negative
TCGA-BH-A0WA	Negative
TCGA-EW-A1P8	Negative
TCGA-AR-A5QQ	Negative
TCGA-D8-A27H	Negative
TCGA-D8-A1XK	Negative
TCGA-A2-A0SX	Negative
TCGA-AO-A0J6	Negative
TCGA-EW-A1OW	Negative
TCGA-GI-A2C9	Negative
TCGA-AN-A0FL	Positive
TCGA-D8-A1JF	Negative
TCGA-E2-A1L7	Negative
TCGA-GM-A2DH	Negative
TCGA-A7-A6VW	Negative
TCGA-AO-A129	Negative
TCGA-A7-A6VY	Negative
TCGA-D8-A1XQ	Negative
TCGA-A7-A0DA	Negative
TCGA-C8-A3M7	Negative
TCGA-E2-A1LL	Negative
TCGA-C8-A1HJ	Negative
TCGA-AN-A0XU	Negative
TCGA-BH-A18Q	Positive
TCGA-GM-A2DF	Negative
TCGA-BH-A1F6	Negative
TCGA-A1-A0SK	Negative
TCGA-AC-A2BK	Negative
TCGA-D8-A27F	Negative
TCGA-A2-A0D2	Negative
TCGA-BH-A0E0	Negative
TCGA-E2-A1LS	Negative
TCGA-A8-A07C	Negative
TCGA-BH-A18V	Negative
TCGA-D8-A147	Negative
TCGA-E2-A14N	Negative
TCGA-E2-A150	Negative
TCGA-AN-A0G0	Negative
TCGA-AR-A1AY	Negative
TCGA-BH-A0B3	Negative
TCGA-A8-A07O	Negative
TCGA-E9-A5FL	Negative
TCGA-AC-A6IW	Negative
TCGA-S3-AA10	Negative
TCGA-AR-A2LR	Negative
TCGA-A2-A3XT	Negative
TCGA-D8-A1JL	Negative
TCGA-E9-A1N8	Negative
TCGA-BH-A1FC	Negative
TCGA-B6-A402	Negative
TCGA-AO-A124	Negative
TCGA-AN-A0AL	Negative
TCGA-LL-A441	Negative
TCGA-HN-A2NL	Negative
TCGA-E2-A158	Negative
TCGA-AO-A0J4	Negative
TCGA-EW-A1P4	Negative
TCGA-AN-A0FJ	Positive
TCGA-D8-A143	Negative
TCGA-A7-A4SE	Negative
TCGA-C8-A131	Negative
TCGA-GM-A2DB	Negative
TCGA-BH-A1EW	Negative
TCGA-AN-A0AR	Negative
TCGA-A2-A0T2	Negative
TCGA-E2-A14R	Negative
TCGA-A2-A0YE	Negative
TCGA-AO-A12F	Negative
TCGA-AR-A0TU	Negative
TCGA-D8-A13Z	Negative
TCGA-AN-A04D	Negative
TCGA-OL-A6VO	Negative
TCGA-BH-A18G	Negative
TCGA-E9-A22G	Positive
TCGA-A2-A0EQ	Positive
TCGA-BH-A18V	Negative
TCGA-A2-A0D0	Negative
TCGA-EW-A1PB	Negative
TCGA-AN-A0FX	Positive
TCGA-BH-A18T	Positive

## Sheet: ESR1
Case ID	ESR1
TCGA-AO-A1KS	Positive
TCGA-V7-A7HQ	Positive
TCGA-AC-A2B8	Positive
TCGA-E2-A10A	Positive
TCGA-AR-A1AV	Positive
TCGA-A7-A425	Positive
TCGA-BH-A0HX	Positive
TCGA-AQ-A0Y5	Positive
TCGA-E2-A1BD	Positive
TCGA-E2-A1B4	Positive
TCGA-OL-A5DA	Positive
TCGA-E2-A152	Positive
TCGA-E2-A15C	Positive
TCGA-AR-A0TW	Positive
TCGA-EW-A1J5	Positive
TCGA-D8-A73X	Positive
TCGA-AR-A5QN	Positive
TCGA-AC-A7VB	Positive
TCGA-D8-A27W	Positive
TCGA-A8-A090	Positive
TCGA-BH-A1F2	Positive
TCGA-D8-A1Y0	Positive
TCGA-AR-A0U2	Positive
TCGA-A7-A2KD	Positive
TCGA-BH-A18H	Positive
TCGA-B6-A0RH	Positive
TCGA-A7-A0DB	Positive
TCGA-E9-A22B	Positive
TCGA-AQ-A04H	Positive
TCGA-A7-A4SA	Positive
TCGA-AC-A4ZE	Positive
TCGA-BH-A18K	Positive
TCGA-BH-A0C1	Positive
TCGA-D8-A73W	Positive
TCGA-A2-A1G4	Positive
TCGA-AR-A2LL	Positive
TCGA-A2-A0SW	Positive
TCGA-EW-A1PG	Positive
TCGA-AO-A12C	Positive
TCGA-AR-A0U3	Positive
TCGA-AR-A24M	Positive
TCGA-AC-A62V	Positive
TCGA-A2-A0ET	Positive
TCGA-GM-A2DA	Positive
TCGA-A8-A0A6	Positive
TCGA-AR-A24O	Positive
TCGA-A1-A0SB	Positive
TCGA-D8-A1XV	Positive
TCGA-E2-A14X	Negative
TCGA-WT-AB44	Positive
TCGA-BH-A0HP	Positive
TCGA-E9-A1N5	Positive
TCGA-A8-A07I	Positive
TCGA-A1-A0SN	Positive
TCGA-B6-A1KN	Negative
TCGA-B6-A0WW	Positive
TCGA-E2-A15R	Positive
TCGA-A8-A09N	Positive
TCGA-BH-A8FZ	Positive
TCGA-EW-A1IZ	Positive
TCGA-JL-A3YX	Positive
TCGA-E2-A154	Positive
TCGA-AR-A251	Positive
TCGA-AO-A125	Positive
TCGA-A2-A04Y	Positive
TCGA-E2-A2P5	Positive
TCGA-E2-A1L8	Positive
TCGA-AR-A24V	Positive
TCGA-AR-A24Q	Positive
TCGA-B6-A0RV	Positive
TCGA-D8-A27E	Positive
TCGA-D8-A4Z1	Positive
TCGA-AO-A12A	Positive
TCGA-LL-A5YM	Positive
TCGA-AN-A03X	Positive
TCGA-A2-A1G1	Negative
TCGA-EW-A1IW	Positive
TCGA-A7-A13D	Negative
TCGA-E9-A1NF	Positive
TCGA-GM-A5PV	Positive
TCGA-B6-A408	Positive
TCGA-AO-A0JI	Positive
TCGA-A8-A09E	Positive
TCGA-EW-A1PC	Positive
TCGA-BH-A0EB	Positive
TCGA-AC-A5XU	Positive
TCGA-D8-A145	Positive
TCGA-BH-A0BD	Positive
TCGA-BH-A0W3	Positive
TCGA-AN-A0FK	Positive
TCGA-A2-A3Y0	Positive
TCGA-A8-A08G	Positive
TCGA-C8-A135	Negative
TCGA-BH-A0H6	Positive
TCGA-D8-A1JJ	Positive
TCGA-B6-A1KF	Negative
TCGA-AN-A0FS	Positive
TCGA-BH-A1FM	Positive
TCGA-A8-A09W	Positive
TCGA-BH-A0DG	Positive
TCGA-AR-A1AL	Positive
TCGA-C8-A273	Positive
TCGA-AC-A23E	Positive
TCGA-BH-A0B7	Positive
TCGA-5L-AAT0	Positive
TCGA-AN-A0AS	Positive
TCGA-AN-A04C	Negative
TCGA-LL-A7SZ	Positive
TCGA-3C-AALI	Positive
TCGA-A7-A6VX	Positive
TCGA-AO-A03R	Positive
TCGA-EW-A1J3	Positive
TCGA-AN-A0FV	Negative
TCGA-A7-A56D	Positive
TCGA-AR-A2LK	Positive
TCGA-PE-A5DC	Positive
TCGA-AR-A1AM	Positive
TCGA-B6-A400	Negative
TCGA-AC-A2BM	Positive
TCGA-BH-A18J	Positive
TCGA-A7-A13E	Positive
TCGA-A2-A0SY	Positive
TCGA-OL-A66J	Positive
TCGA-D8-A1XW	Negative
TCGA-E2-A14Q	Positive
TCGA-A8-A06X	Positive
TCGA-C8-A1HL	Positive
TCGA-A8-A09X	Negative
TCGA-A7-A3RF	Positive
TCGA-A8-A08P	Positive
TCGA-A7-A4SB	Positive
TCGA-A1-A0SD	Positive
TCGA-E9-A1R2	Positive
TCGA-BH-A0H9	Positive
TCGA-AN-A0AJ	Positive
TCGA-A8-A06Q	Positive
TCGA-AC-A2FK	Positive
TCGA-D8-A1JS	Positive
TCGA-E2-A14U	Positive
TCGA-A8-A091	Positive
TCGA-D8-A27I	Positive
TCGA-BH-A0HW	Positive
TCGA-E2-A156	Positive
TCGA-AN-A0XL	Positive
TCGA-BH-A0E2	Positive
TCGA-A2-A0CY	Positive
TCGA-B6-A0WY	Positive
TCGA-C8-A12M	Positive
TCGA-D8-A1XU	Positive
TCGA-AN-A049	Positive
TCGA-A2-A04V	Positive
TCGA-A2-A0YT	Positive
TCGA-A2-A25B	Positive
TCGA-E9-A54X	Positive
TCGA-GM-A2DM	Positive
TCGA-E2-A14Y	Positive
TCGA-BH-A0DV	Positive
TCGA-LL-A5YP	Positive
TCGA-A8-A085	Positive
TCGA-E2-A15S	Positive
TCGA-D8-A1JT	Positive
TCGA-A2-A0EO	Positive
TCGA-A2-A3KD	Positive
TCGA-A2-A25D	Positive
TCGA-AC-A8OR	Positive
TCGA-S3-A6ZH	Positive
TCGA-C8-A1HM	Positive
TCGA-EW-A1IY	Positive
TCGA-AO-A03O	Positive
TCGA-A7-A5ZX	Positive
TCGA-B6-A0IK	Negative
TCGA-E2-A1B0	Negative
TCGA-EW-A1J2	Positive
TCGA-C8-A1HG	Positive
TCGA-A8-A06O	Positive
TCGA-EW-A1OZ	Positive
TCGA-A2-A0SU	Positive
TCGA-E2-A15F	Positive
TCGA-E2-A109	Positive
TCGA-BH-A0AY	Positive
TCGA-E2-A572	Positive
TCGA-D8-A1X9	Positive
TCGA-A2-A0CV	Positive
TCGA-BH-A1ET	Positive
TCGA-A8-A075	Positive
TCGA-E2-A107	Positive
TCGA-AC-A62Y	Positive
TCGA-B6-A0RI	Positive
TCGA-E2-A15E	Positive
TCGA-A8-A07S	Positive
TCGA-LQ-A4E4	Positive
TCGA-B6-A0IA	Positive
TCGA-A7-A3IY	Positive
TCGA-A8-A0AD	Positive
TCGA-A2-A0YC	Positive
TCGA-BH-A1FG	Positive
TCGA-C8-A12N	Positive
TCGA-A8-A08I	Positive
TCGA-A2-A0YH	Positive
TCGA-D8-A27P	Positive
TCGA-BH-A1EN	Negative
TCGA-LL-A73Z	Positive
TCGA-A2-A4RW	Positive
TCGA-E2-A14T	Positive
TCGA-A2-A0EY	Positive
TCGA-D8-A1XS	Positive
TCGA-D8-A1XL	Positive
TCGA-AR-A254	Positive
TCGA-A2-A0YJ	Positive
TCGA-A1-A0SJ	Positive
TCGA-BH-A1FD	Positive
TCGA-AO-A1KT	Positive
TCGA-AO-A0J8	Positive
TCGA-A2-A0T7	Positive
TCGA-EW-A6SC	Positive
TCGA-BH-A0BP	Positive
TCGA-A2-A4RY	Positive
TCGA-A7-A13H	Positive
TCGA-BH-A0E9	Positive
TCGA-AN-A0XR	Positive
TCGA-AN-A0AK	Positive
TCGA-AR-A1AT	Positive
TCGA-BH-A0BV	Positive
TCGA-D8-A27T	Positive
TCGA-E2-A10B	Positive
TCGA-D8-A27R	Positive
TCGA-C8-A274	Positive
TCGA-A7-A0CD	Positive
TCGA-AC-A23H	Positive
TCGA-B6-A2IU	Positive
TCGA-A8-A086	Positive
TCGA-A8-A07L	Positive
TCGA-A2-A259	Positive
TCGA-AO-A03V	Positive
TCGA-E9-A3Q9	Positive
TCGA-E2-A1L6	Positive
TCGA-BH-A0DQ	Positive
TCGA-A2-A0CS	Positive
TCGA-AN-A0XV	Positive
TCGA-C8-A138	Positive
TCGA-OL-A5RU	Positive
TCGA-EW-A1OY	Positive
TCGA-D8-A27G	Positive
TCGA-A8-A09D	Positive
TCGA-D8-A13Y	Positive
TCGA-BH-A1F5	Positive
TCGA-AC-A5EH	Positive
TCGA-BH-A18U	Positive
TCGA-AR-A0TX	Positive
TCGA-BH-A0DS	Positive
TCGA-D8-A27K	Positive
TCGA-A2-A0EX	Positive
TCGA-E9-A3X8	Positive
TCGA-AR-A0TQ	Positive
TCGA-A8-A08C	Positive
TCGA-D8-A1JK	Negative
TCGA-B6-A409	Negative
TCGA-E2-A10F	Positive
TCGA-D8-A1X7	Positive
TCGA-C8-A132	Positive
TCGA-BH-A1FL	Positive
TCGA-A2-A0CT	Positive
TCGA-D8-A1X5	Positive
TCGA-A2-A3XW	Positive
TCGA-W8-A86G	Positive
TCGA-B6-A0RP	Positive
TCGA-AR-A250	Positive
TCGA-B6-A0RO	Positive
TCGA-D8-A1JD	Positive
TCGA-S3-A6ZF	Positive
TCGA-BH-A0DX	Positive
TCGA-E2-A56Z	Positive
TCGA-BH-A0B0	Positive
TCGA-EW-A6S9	Positive
TCGA-D8-A3Z5	Positive
TCGA-OL-A66O	Positive
TCGA-E2-A15A	Positive
TCGA-A2-A0EW	Positive
TCGA-A8-A07P	Positive
TCGA-BH-A42T	Positive
TCGA-BH-A0DI	Positive
TCGA-A8-A08X	Negative
TCGA-EW-A424	Positive
TCGA-B6-A0X0	Positive
TCGA-A7-A13E	Positive
TCGA-B6-A0X1	Negative
TCGA-D8-A1Y3	Positive
TCGA-E2-A1IG	Positive
TCGA-BH-A0GY	Positive
TCGA-A8-A07B	Positive
TCGA-BH-A1FJ	Negative
TCGA-BH-A0BO	Positive
TCGA-D8-A1XY	Positive
TCGA-BH-A0DH	Positive
TCGA-E2-A570	Positive
TCGA-BH-A0BJ	Positive
TCGA-A8-A092	Positive
TCGA-D8-A1XT	Negative
TCGA-B6-A40B	Positive
TCGA-B6-A0IB	Positive
TCGA-OL-A5S0	Positive
TCGA-A2-A0D3	Positive
TCGA-LD-A74U	Positive
TCGA-LL-A6FQ	Positive
TCGA-E2-A1IO	Positive
TCGA-BH-A0BC	Positive
TCGA-AO-A12E	Positive
TCGA-AO-A0JB	Positive
TCGA-E2-A576	Positive
TCGA-A8-A082	Positive
TCGA-LL-A442	Positive
TCGA-AR-A0TR	Positive
TCGA-A7-A13F	Positive
TCGA-E9-A1N6	Positive
TCGA-AR-A24X	Positive
TCGA-A8-A09Z	Positive
TCGA-BH-A0H3	Positive
TCGA-AN-A0FT	Positive
TCGA-A2-A3XZ	Negative
TCGA-C8-A1HI	Positive
TCGA-C8-A8HP	Negative
TCGA-AO-A0JG	Positive
TCGA-BH-A202	Positive
TCGA-S3-AA12	Positive
TCGA-C8-A137	Negative
TCGA-BH-A0DE	Positive
TCGA-D8-A1X8	Positive
TCGA-A8-A08A	Positive
TCGA-E2-A10C	Positive
TCGA-D8-A1JE	Positive
TCGA-EW-A6SD	Negative
TCGA-A2-A0YL	Positive
TCGA-BH-A0BR	Positive
TCGA-BH-A0W4	Positive
TCGA-BH-A0BQ	Positive
TCGA-A8-A09V	Positive
TCGA-E2-A1LA	Positive
TCGA-B6-A401	Positive
TCGA-C8-A1HN	Positive
TCGA-BH-A0HK	Positive
TCGA-BH-A0DP	Positive
TCGA-LL-A8F5	Positive
TCGA-A2-A0EU	Positive
TCGA-E2-A2P6	Positive
TCGA-OL-A5RV	Positive
TCGA-A2-A0T4	Positive
TCGA-A2-A0SV	Positive
TCGA-A7-A26H	Positive
TCGA-B6-A1KI	Positive
TCGA-E2-A1IU	Positive
TCGA-AC-A3TM	Positive
TCGA-AO-A0JM	Positive
TCGA-D8-A1JH	Positive
TCGA-B6-A0RM	Positive
TCGA-D8-A1XD	Positive
TCGA-AO-A126	Positive
TCGA-BH-A0DD	Positive
TCGA-BH-A0E1	Positive
TCGA-3C-AALK	Positive
TCGA-LL-A5YN	Positive
TCGA-A7-A13D	Negative
TCGA-BH-A0HB	Positive
TCGA-A7-A3IZ	Positive
TCGA-BH-A1F8	Positive
TCGA-AC-A3EH	Positive
TCGA-AC-A23C	Positive
TCGA-A8-A08L	Positive
TCGA-LL-A6FP	Positive
TCGA-GM-A2DL	Positive
TCGA-EW-A2FR	Negative
TCGA-A8-A084	Positive
TCGA-A2-A04X	Positive
TCGA-E2-A1LE	Negative
TCGA-A8-A083	Positive
TCGA-OL-A5D8	Positive
TCGA-BH-A18P	Positive
TCGA-D8-A1XJ	Positive
TCGA-C8-A26V	Positive
TCGA-A8-A09M	Positive
TCGA-AO-A0J5	Positive
TCGA-BH-A201	Positive
TCGA-BH-A0HU	Positive
TCGA-AO-A12H	Positive
TCGA-AR-A2LN	Positive
TCGA-LD-A7W6	Positive
TCGA-E2-A9RU	Positive
TCGA-B6-A0IM	Positive
TCGA-BH-A0HF	Positive
TCGA-AR-A24N	Positive
TCGA-C8-A1HE	Positive
TCGA-A8-A09K	Positive
TCGA-A8-A07W	Positive
TCGA-BH-A18F	Positive
TCGA-A7-A0D9	Positive
TCGA-E2-A15K	Positive
TCGA-A2-A0CW	Positive
TCGA-BH-A42V	Positive
TCGA-A8-A09T	Positive
TCGA-BH-A0HL	Positive
TCGA-LL-A9Q3	Positive
TCGA-A2-A0YD	Positive
TCGA-AC-A3HN	Positive
TCGA-LL-A5YL	Positive
TCGA-AR-A0TY	Positive
TCGA-A8-A06Z	Positive
TCGA-A2-A0CZ	Positive
TCGA-B6-A0X5	Positive
TCGA-B6-A0IP	Positive
TCGA-BH-AB28	Positive
TCGA-BH-A0B4	Positive
TCGA-C8-A130	Positive
TCGA-C8-A133	Positive
TCGA-AO-A03L	Positive
TCGA-A1-A0SG	Positive
TCGA-B6-A0RN	Negative
TCGA-AR-A0TZ	Positive
TCGA-C8-A12L	Negative
TCGA-C8-A3M8	Positive
TCGA-EW-A2FS	Positive
TCGA-AR-A5QP	Positive
TCGA-BH-A0B8	Positive
TCGA-EW-A1PD	Positive
TCGA-AN-A0FW	Positive
TCGA-AC-A7VC	Negative
TCGA-GM-A2D9	Positive
TCGA-BH-A0B5	Positive
TCGA-EW-A6SA	Positive
TCGA-A8-A09Q	Positive
TCGA-BH-A0AZ	Positive
TCGA-BH-A1FR	Positive
TCGA-E2-A14O	Positive
TCGA-AO-A0J7	Positive
TCGA-AN-A0AM	Positive
TCGA-E2-A1II	Negative
TCGA-GI-A2C8	Positive
TCGA-AR-A24R	Positive
TCGA-A7-A26E	Positive
TCGA-B6-A1KC	Positive
TCGA-E2-A15K	Positive
TCGA-D8-A1JM	Positive
TCGA-BH-A18M	Positive
TCGA-A8-A099	Positive
TCGA-E2-A14P	Negative
TCGA-BH-A5IZ	Positive
TCGA-AN-A0XP	Positive
TCGA-A2-A0D1	Negative
TCGA-A2-A0YF	Positive
TCGA-A8-A094	Positive
TCGA-A7-A26J	Positive
TCGA-AR-A24K	Positive
TCGA-AO-A1KQ	Positive
TCGA-A8-A0AB	Positive
TCGA-A2-A1FV	Positive
TCGA-A1-A0SE	Positive
TCGA-A8-A095	Positive
TCGA-D8-A1Y1	Positive
TCGA-AR-A24L	Positive
TCGA-EW-A1IX	Positive
TCGA-A2-A0T5	Positive
TCGA-EW-A2FW	Positive
TCGA-D8-A1XB	Positive
TCGA-D8-A27V	Positive
TCGA-S3-AA14	Positive
TCGA-D8-A1XM	Positive
TCGA-C8-A12Q	Negative
TCGA-AR-A2LO	Positive
TCGA-A8-A09B	Positive
TCGA-AR-A1AK	Positive
TCGA-E2-A15E	Positive
TCGA-E2-A1IK	Positive
TCGA-AC-A62X	Positive
TCGA-GM-A2DK	Positive
TCGA-S3-A6ZG	Positive
TCGA-E2-A155	Positive
TCGA-OL-A66K	Positive
TCGA-A1-A0SM	Positive
TCGA-HN-A2OB	Positive
TCGA-A8-A08Z	Positive
TCGA-D8-A1XO	Positive
TCGA-AO-A03T	Positive
TCGA-A7-A4SC	Positive
TCGA-BH-A0DO	Positive
TCGA-A8-A08F	Positive
TCGA-E2-A1IN	Positive
TCGA-E9-A227	Positive
TCGA-A2-A04R	Positive
TCGA-A8-A081	Positive
TCGA-AN-A0FZ	Positive
TCGA-BH-A1FH	Positive
TCGA-AC-A3W7	Positive
TCGA-GM-A2DC	Positive
TCGA-D8-A1XG	Positive
TCGA-4H-AAAK	Positive
TCGA-OL-A5RX	Positive
TCGA-AO-A12B	Positive
TCGA-BH-A0HO	Positive
TCGA-E9-A6HE	Positive
TCGA-E2-A15O	Positive
TCGA-E2-A1LB	Negative
TCGA-A8-A08S	Positive
TCGA-AN-A0FY	Positive
TCGA-A8-A06R	Positive
TCGA-D8-A1JI	Positive
TCGA-A7-A26J	Positive
TCGA-E2-A15I	Positive
TCGA-A2-A0D4	Positive
TCGA-LD-A66U	Positive
TCGA-B6-A0IJ	Positive
TCGA-D8-A146	Positive
TCGA-B6-A0I5	Positive
TCGA-A2-A3KC	Positive
TCGA-E2-A14W	Positive
TCGA-GM-A3XN	Positive
TCGA-E9-A1N9	Negative
TCGA-A7-A3J0	Positive
TCGA-BH-A0DZ	Positive
TCGA-BH-A0B1	Positive
TCGA-EW-A1PE	Positive
TCGA-BH-A0HY	Positive
TCGA-AO-A0JF	Positive
TCGA-AO-A03P	Positive
TCGA-A2-A4S0	Positive
TCGA-EW-A1P6	Positive
TCGA-BH-A0BA	Positive
TCGA-UU-A93S	Negative
TCGA-A8-A07F	Positive
TCGA-E2-A15J	Positive
TCGA-E2-A1IF	Positive
TCGA-A2-A0YG	Positive
TCGA-GM-A3XG	Positive
TCGA-A2-A0EM	Positive
TCGA-A7-A4SF	Positive
TCGA-AR-A24T	Positive
TCGA-AO-A1KO	Positive
TCGA-BH-A0HA	Positive
TCGA-A8-A06U	Positive
TCGA-A8-A0A9	Positive
TCGA-A2-A1FZ	Positive
TCGA-E2-A1IL	Positive
TCGA-EW-A2FV	Positive
TCGA-OK-A5Q2	Positive
TCGA-BH-A1FN	Positive
TCGA-BH-A1FE	Positive
TCGA-AC-A6IX	Positive
TCGA-BH-A0C0	Positive
TCGA-A1-A0SH	Negative
TCGA-AR-A2LQ	Positive
TCGA-AC-A5XS	Positive
TCGA-AR-A1AN	Positive
TCGA-AR-A0TV	Positive
TCGA-WT-AB41	Positive
TCGA-AC-A2FO	Positive
TCGA-A8-A09I	Positive
TCGA-GM-A5PX	Positive
TCGA-BH-A1EV	Positive
TCGA-E2-A1L9	Positive
TCGA-BH-A0C7	Positive
TCGA-A8-A07G	Positive
TCGA-D8-A1XR	Positive
TCGA-AC-A8OP	Positive
TCGA-AC-A3TN	Positive
TCGA-A7-A3J1	Positive
TCGA-BH-A6R8	Positive
TCGA-A8-A08J	Positive
TCGA-E2-A106	Positive
TCGA-AN-A041	Positive
TCGA-AR-A5QM	Positive
TCGA-A2-A0EV	Positive
TCGA-D8-A1JP	Positive
TCGA-BH-A1ES	Positive
TCGA-A7-A0DB	Positive
TCGA-EW-A1PA	Positive
TCGA-AR-A1AS	Positive
TCGA-MS-A51U	Positive
TCGA-A2-A1G0	Positive
TCGA-EW-A6SB	Negative
TCGA-LL-A6FR	Negative
TCGA-AC-A8OS	Positive
TCGA-BH-A18N	Positive
TCGA-E2-A105	Positive
TCGA-AR-A2LM	Positive
TCGA-C8-A27A	Positive
TCGA-A8-A07E	Positive
TCGA-GM-A3NW	Negative
TCGA-A2-A4S2	Positive
TCGA-A8-A07Z	Positive
TCGA-B6-A0WZ	Positive
TCGA-EW-A1P0	Positive
TCGA-E2-A15L	Positive
TCGA-B6-A0IC	Positive
TCGA-C8-A1HF	Negative
TCGA-S3-AA11	Positive
TCGA-BH-A18I	Positive
TCGA-Z7-A8R6	Positive
TCGA-BH-A18S	Positive
TCGA-AO-A1KP	Positive
TCGA-AN-A046	Positive
TCGA-AN-A0XO	Positive
TCGA-AQ-A1H2	Positive
TCGA-BH-A0DT	Positive
TCGA-AC-A3YI	Positive
TCGA-A7-A26E	Positive
TCGA-AO-A03N	Positive
TCGA-B6-A0WS	Positive
TCGA-A8-A06T	Positive
TCGA-A1-A0SI	Positive
TCGA-BH-A0H0	Positive
TCGA-C8-A8HQ	Positive
TCGA-OL-A66N	Positive
TCGA-A1-A0SF	Positive
TCGA-B6-A40C	Positive
TCGA-OL-A66L	Positive
TCGA-B6-A0RL	Positive
TCGA-E2-A15A	Positive
TCGA-D8-A1J9	Positive
TCGA-A8-A08T	Positive
TCGA-E2-A1BC	Positive
TCGA-BH-A0HN	Positive
TCGA-A2-A4S3	Positive
TCGA-A2-A0CK	Positive
TCGA-A8-A0A2	Positive
TCGA-B6-A0X7	Positive
TCGA-E2-A15G	Positive
TCGA-OL-A66H	Positive
TCGA-D8-A1JC	Positive
TCGA-A8-A097	Positive
TCGA-A8-A079	Positive
TCGA-BH-A0DL	Positive
TCGA-AN-A0XS	Negative
TCGA-B6-A0WT	Positive
TCGA-AO-A0JL	Negative
TCGA-A2-A25E	Positive
TCGA-D8-A1XC	Positive
TCGA-B6-A0IG	Positive
TCGA-A8-A08B	Positive
TCGA-C8-A12W	Positive
TCGA-A7-A0CJ	Positive
TCGA-E2-A14V	Positive
TCGA-AR-A255	Positive
TCGA-A8-A08O	Positive
TCGA-AQ-A54O	Positive
TCGA-AR-A24Z	Positive
TCGA-AC-A6IX	Positive
TCGA-BH-A0HQ	Positive
TCGA-D8-A1JA	Negative
TCGA-AN-A04A	Positive
TCGA-AC-A3YJ	Positive
TCGA-EW-A1J1	Positive
TCGA-C8-A1HK	Negative
TCGA-AC-A3QP	Positive
TCGA-BH-A0HI	Positive
TCGA-BH-A28Q	Positive
TCGA-EW-A3E8	Positive
TCGA-E9-A1N4	Positive
TCGA-B6-A0WV	Positive
TCGA-EW-A1PF	Positive
TCGA-E2-A15H	Positive
TCGA-E9-A1NC	Negative
TCGA-A8-A0A4	Positive
TCGA-A2-A0CP	Positive
TCGA-A8-A06P	Positive
TCGA-AC-A2FG	Positive
TCGA-E2-A15P	Positive
TCGA-A8-A06N	Positive
TCGA-PE-A5DD	Positive
TCGA-D8-A1XZ	Positive
TCGA-A2-A0ER	Positive
TCGA-BH-A1EX	Positive
TCGA-C8-A12T	Positive
TCGA-5T-A9QA	Positive
TCGA-E9-A1NI	Positive
TCGA-A7-A5ZW	Positive
TCGA-A8-A06Y	Positive
TCGA-EW-A1J6	Positive
TCGA-B6-A0RQ	Positive
TCGA-GM-A3NY	Positive
TCGA-BH-A0EA	Positive
TCGA-C8-A12Z	Negative
TCGA-BH-A0H7	Positive
TCGA-C8-A12P	Negative
TCGA-D8-A1X6	Positive
TCGA-E9-A1NH	Positive
TCGA-BH-A8FY	Positive
TCGA-AR-A24W	Positive
TCGA-BH-A0AU	Positive
TCGA-BH-A0E7	Positive
TCGA-AR-A1AU	Positive
TCGA-AO-A03M	Positive
TCGA-D8-A1JB	Positive
TCGA-D8-A27L	Positive
TCGA-A7-A426	Positive
TCGA-BH-A1FU	Negative
TCGA-A2-A0CQ	Positive
TCGA-A8-A09G	Positive
TCGA-C8-A12X	Positive
TCGA-A2-A04W	Negative
TCGA-BH-A1ES	Positive
TCGA-OL-A6VR	Positive
TCGA-B6-A0RG	Negative
TCGA-A7-A0CG	Positive
TCGA-A2-A1FX	Positive
TCGA-LL-A50Y	Positive
TCGA-B6-A0X4	Positive
TCGA-B6-A0IH	Positive
TCGA-AN-A0XT	Positive
TCGA-A1-A0SQ	Positive
TCGA-BH-A0EI	Positive
TCGA-D8-A27N	Positive
TCGA-3C-AALJ	Positive
TCGA-EW-A1OX	Positive
TCGA-BH-A18L	Positive
TCGA-BH-A0BM	Positive
TCGA-EW-A1P3	Positive
TCGA-AC-A6NO	Positive
TCGA-A2-A04N	Positive
TCGA-E9-A295	Positive
TCGA-A8-A09R	Positive
TCGA-A2-A0CU	Positive
TCGA-A8-A093	Positive
TCGA-D8-A1XF	Positive
TCGA-D8-A140	Positive
TCGA-AR-A24H	Positive
TCGA-C8-A12U	Positive
TCGA-E9-A22H	Positive
TCGA-OL-A5RZ	Positive
TCGA-AO-A0JD	Positive
TCGA-EW-A1P5	Positive
TCGA-A8-A076	Positive
TCGA-E2-A14Z	Positive
TCGA-A2-A25C	Positive
TCGA-A2-A3XV	Positive
TCGA-S3-AA0Z	Positive
TCGA-BH-A0BT	Positive
TCGA-AR-A2LE	Positive
TCGA-C8-A26W	Positive
TCGA-AN-A0FD	Positive
TCGA-A2-A4RX	Positive
TCGA-A2-A0T3	Positive
TCGA-E2-A15D	Positive
TCGA-BH-A28O	Positive
TCGA-E9-A1NA	Positive
TCGA-E2-A15T	Positive
TCGA-BH-A0C3	Positive
TCGA-A2-A0ES	Positive
TCGA-EW-A423	Positive
TCGA-AR-A24P	Positive
TCGA-C8-A12O	Positive
TCGA-D8-A1JN	Positive
TCGA-AQ-A1H3	Positive
TCGA-GM-A2DN	Positive
TCGA-D8-A1J8	Positive
TCGA-E2-A10E	Positive
TCGA-AQ-A04L	Positive
TCGA-AO-A0JA	Positive
TCGA-C8-A26Z	Positive
TCGA-D8-A3Z6	Positive
TCGA-BH-A0EE	Negative
TCGA-C8-A1HO	Positive
TCGA-AO-A0J3	Positive
TCGA-E2-A1IE	Positive
TCGA-A2-A0CX	Positive
TCGA-AN-A0FF	Positive
TCGA-AC-A2QI	Positive
TCGA-A2-A1FW	Positive
TCGA-D8-A1XA	Positive
TCGA-B6-A0I1	Negative
TCGA-E2-A153	Positive
TCGA-BH-A1FE	Positive
TCGA-Z7-A8R5	Positive
TCGA-BH-A0GZ	Positive
TCGA-AR-A1AP	Positive
TCGA-B6-A0IN	Positive
TCGA-UL-AAZ6	Positive
TCGA-AO-A12G	Positive
TCGA-LL-A7T0	Positive
TCGA-3C-AAAU	Positive
TCGA-B6-A0IO	Positive
TCGA-AN-A03Y	Positive
TCGA-A8-A09A	Positive
TCGA-A2-A25A	Positive
TCGA-EW-A1PH	Negative
TCGA-BH-A42U	Negative
TCGA-B6-A0WX	Negative
TCGA-A7-A6VV	Negative
TCGA-BH-A0B9	Negative
TCGA-A2-A3XS	Negative
TCGA-A8-A07R	Negative
TCGA-AN-A0AT	Negative
TCGA-A2-A04P	Negative
TCGA-A2-A3XX	Negative
TCGA-A1-A0SP	Negative
TCGA-AO-A1KR	Negative
TCGA-E2-A1LG	Negative
TCGA-AQ-A04J	Negative
TCGA-C8-A134	Negative
TCGA-AR-A0TP	Positive
TCGA-A2-A0T0	Negative
TCGA-LL-A740	Negative
TCGA-A2-A3XY	Negative
TCGA-BH-A0BG	Negative
TCGA-C8-A26Y	Negative
TCGA-BH-A0BW	Negative
TCGA-AO-A0J2	Negative
TCGA-AR-A1AH	Positive
TCGA-A2-A1G6	Negative
TCGA-A8-A08R	Negative
TCGA-B6-A0IE	Negative
TCGA-AR-A256	Negative
TCGA-C8-A27B	Negative
TCGA-A2-A04U	Negative
TCGA-LL-A73Y	Negative
TCGA-A2-A0CM	Negative
TCGA-BH-A0WA	Negative
TCGA-A1-A0SO	Negative
TCGA-A7-A0CE	Negative
TCGA-EW-A1P8	Negative
TCGA-AR-A5QQ	Negative
TCGA-D8-A27H	Negative
TCGA-D8-A1XK	Negative
TCGA-A2-A0SX	Negative
TCGA-AO-A0J6	Negative
TCGA-EW-A1OW	Negative
TCGA-GI-A2C9	Negative
TCGA-AN-A0FL	Negative
TCGA-AR-A2LH	Negative
TCGA-D8-A1JF	Negative
TCGA-E2-A1L7	Negative
TCGA-GM-A2DH	Negative
TCGA-A7-A5ZV	Negative
TCGA-A7-A6VW	Negative
TCGA-AO-A129	Negative
TCGA-B6-A0I6	Negative
TCGA-A7-A6VY	Negative
TCGA-D8-A1XQ	Negative
TCGA-A7-A0DA	Negative
TCGA-C8-A3M7	Negative
TCGA-E2-A1LL	Negative
TCGA-E2-A573	Negative
TCGA-C8-A1HJ	Negative
TCGA-AN-A0XU	Negative
TCGA-BH-A18Q	Negative
TCGA-GM-A2DF	Negative
TCGA-BH-A1F6	Negative
TCGA-A1-A0SK	Negative
TCGA-AR-A0U0	Negative
TCGA-E2-A1AZ	Negative
TCGA-AC-A2BK	Negative
TCGA-D8-A27F	Negative
TCGA-OL-A5D7	Negative
TCGA-A2-A0D2	Negative
TCGA-BH-A0E0	Negative
TCGA-E2-A1LS	Negative
TCGA-A8-A07C	Negative
TCGA-BH-A18V	Negative
TCGA-A2-A04T	Negative
TCGA-AC-A8OQ	Negative
TCGA-D8-A147	Negative
TCGA-E2-A14N	Negative
TCGA-E2-A150	Negative
TCGA-AN-A0G0	Negative
TCGA-AR-A1AY	Negative
TCGA-AR-A1AI	Negative
TCGA-BH-A0B3	Negative
TCGA-B6-A0RS	Negative
TCGA-A8-A07O	Negative
TCGA-E9-A5FL	Negative
TCGA-A7-A4SD	Negative
TCGA-AC-A6IW	Negative
TCGA-S3-AA10	Negative
TCGA-AR-A2LR	Negative
TCGA-AR-A1AQ	Negative
TCGA-A2-A3XT	Negative
TCGA-D8-A1JL	Negative
TCGA-OL-A97C	Negative
TCGA-E9-A1N8	Negative
TCGA-BH-A1FC	Negative
TCGA-B6-A402	Negative
TCGA-GM-A3XL	Negative
TCGA-A2-A3XU	Negative
TCGA-AO-A124	Negative
TCGA-BH-A0AV	Negative
TCGA-AN-A0AL	Negative
TCGA-OL-A5D6	Negative
TCGA-BH-A0E6	Negative
TCGA-LL-A441	Negative
TCGA-HN-A2NL	Negative
TCGA-E2-A159	Negative
TCGA-E2-A158	Negative
TCGA-AO-A0J4	Negative
TCGA-EW-A1P4	Negative
TCGA-AN-A0FJ	Positive
TCGA-D8-A143	Negative
TCGA-E2-A1LI	Negative
TCGA-A7-A4SE	Negative
TCGA-C8-A131	Negative
TCGA-GM-A2DB	Negative
TCGA-AQ-A54N	Negative
TCGA-BH-A1EW	Negative
TCGA-AN-A0AR	Negative
TCGA-A2-A0T2	Negative
TCGA-D8-A142	Negative
TCGA-E2-A14R	Negative
TCGA-A2-A0YE	Negative
TCGA-D8-A1JG	Negative
TCGA-B6-A0RU	Negative
TCGA-AO-A12F	Negative
TCGA-AR-A0TU	Negative
TCGA-A2-A0YM	Negative
TCGA-D8-A13Z	Negative
TCGA-E2-A574	Negative
TCGA-E2-A1LK	Negative
TCGA-AN-A04D	Negative
TCGA-OL-A6VO	Negative
TCGA-BH-A18G	Negative
TCGA-E9-A22G	Negative
TCGA-A2-A0EQ	Negative
TCGA-OL-A5RW	Negative
TCGA-BH-A18V	Negative
TCGA-A2-A0D0	Negative
TCGA-EW-A1PB	Negative
TCGA-AN-A0FX	Negative
TCGA-B6-A0IQ	Negative
TCGA-B6-A0RE	Negative
TCGA-BH-A18T	Negative

## Sheet: PGR
Case ID	PGR
TCGA-AO-A1KS	Positive
TCGA-V7-A7HQ	Positive
TCGA-AC-A2B8	Positive
TCGA-E2-A10A	Positive
TCGA-AR-A1AV	Positive
TCGA-A7-A425	Positive
TCGA-BH-A0HX	Positive
TCGA-AQ-A0Y5	Positive
TCGA-E2-A1BD	Positive
TCGA-E2-A1B4	Positive
TCGA-OL-A5DA	Positive
TCGA-E2-A152	Negative
TCGA-E2-A15C	Positive
TCGA-AR-A0TW	Positive
TCGA-EW-A1J5	Positive
TCGA-D8-A73X	Positive
TCGA-AR-A5QN	Positive
TCGA-AC-A7VB	Negative
TCGA-D8-A27W	Positive
TCGA-A8-A090	Positive
TCGA-BH-A1F2	Positive
TCGA-D8-A1Y0	Positive
TCGA-AR-A0U2	Positive
TCGA-A7-A2KD	Positive
TCGA-BH-A18H	Positive
TCGA-B6-A0RH	Positive
TCGA-A7-A0DB	Positive
TCGA-E9-A22B	Negative
TCGA-AQ-A04H	Positive
TCGA-A7-A4SA	Negative
TCGA-AC-A4ZE	Positive
TCGA-BH-A18K	Positive
TCGA-BH-A0C1	Positive
TCGA-D8-A73W	Negative
TCGA-A2-A1G4	Positive
TCGA-AR-A2LL	Positive
TCGA-A2-A0SW	Negative
TCGA-EW-A1PG	Positive
TCGA-AO-A12C	Positive
TCGA-AR-A0U3	Positive
TCGA-AR-A24M	Positive
TCGA-AC-A62V	Positive
TCGA-A2-A0ET	Positive
TCGA-GM-A2DA	Positive
TCGA-A8-A0A6	Positive
TCGA-AR-A24O	Positive
TCGA-A1-A0SB	Negative
TCGA-D8-A1XV	Positive
TCGA-E2-A14X	Negative
TCGA-WT-AB44	Positive
TCGA-BH-A0HP	Negative
TCGA-E9-A1N5	Positive
TCGA-A8-A07I	Negative
TCGA-A1-A0SN	Positive
TCGA-B6-A1KN	Negative
TCGA-B6-A0WW	Positive
TCGA-E2-A15R	Positive
TCGA-A8-A09N	Positive
TCGA-BH-A8FZ	Positive
TCGA-EW-A1IZ	Positive
TCGA-JL-A3YX	Positive
TCGA-E2-A154	Positive
TCGA-AR-A251	Negative
TCGA-AO-A125	Positive
TCGA-A2-A04Y	Positive
TCGA-E2-A2P5	Positive
TCGA-E2-A1L8	Positive
TCGA-AR-A24V	Positive
TCGA-AR-A24Q	Negative
TCGA-B6-A0RV	Positive
TCGA-D8-A27E	Positive
TCGA-D8-A4Z1	Positive
TCGA-AO-A12A	Positive
TCGA-LL-A5YM	Positive
TCGA-AN-A03X	Positive
TCGA-A2-A1G1	Negative
TCGA-EW-A1IW	Positive
TCGA-A7-A13D	Positive
TCGA-E9-A1NF	Positive
TCGA-GM-A5PV	Positive
TCGA-B6-A408	Positive
TCGA-AO-A0JI	Negative
TCGA-A8-A09E	Positive
TCGA-EW-A1PC	Positive
TCGA-BH-A0EB	Positive
TCGA-AC-A5XU	Positive
TCGA-D8-A145	Positive
TCGA-BH-A0BD	Positive
TCGA-BH-A0W3	Positive
TCGA-AN-A0FK	Positive
TCGA-A2-A3Y0	Negative
TCGA-A8-A08G	Positive
TCGA-C8-A135	Negative
TCGA-BH-A0H6	Positive
TCGA-D8-A1JJ	Positive
TCGA-B6-A1KF	Negative
TCGA-AN-A0FS	Negative
TCGA-BH-A1FM	Negative
TCGA-A8-A09W	Positive
TCGA-BH-A0DG	Negative
TCGA-AR-A1AL	Positive
TCGA-C8-A273	Positive
TCGA-AC-A23E	Positive
TCGA-BH-A0B7	Positive
TCGA-5L-AAT0	Positive
TCGA-AN-A0AS	Negative
TCGA-AN-A04C	Negative
TCGA-LL-A7SZ	Positive
TCGA-3C-AALI	Positive
TCGA-A7-A6VX	Positive
TCGA-AO-A03R	Positive
TCGA-EW-A1J3	Positive
TCGA-AN-A0FV	Negative
TCGA-A7-A56D	Positive
TCGA-AR-A2LK	Positive
TCGA-PE-A5DC	Positive
TCGA-AR-A1AM	Positive
TCGA-B6-A400	Negative
TCGA-AC-A2BM	Positive
TCGA-BH-A18J	Positive
TCGA-A7-A13E	Negative
TCGA-A2-A0SY	Positive
TCGA-OL-A66J	Positive
TCGA-D8-A1XW	Positive
TCGA-E2-A14Q	Positive
TCGA-A8-A06X	Negative
TCGA-C8-A1HL	Negative
TCGA-A8-A09X	Negative
TCGA-A7-A3RF	Positive
TCGA-A8-A08P	Positive
TCGA-A7-A4SB	Positive
TCGA-A1-A0SD	Positive
TCGA-E9-A1R2	Negative
TCGA-BH-A0H9	Positive
TCGA-AN-A0AJ	Positive
TCGA-A8-A06Q	Positive
TCGA-AC-A2FK	Positive
TCGA-D8-A1JS	Positive
TCGA-E2-A14U	Positive
TCGA-A8-A091	Negative
TCGA-D8-A27I	Positive
TCGA-BH-A0HW	Negative
TCGA-E2-A156	Positive
TCGA-AN-A0XL	Positive
TCGA-BH-A0E2	Positive
TCGA-A2-A0CY	Positive
TCGA-B6-A0WY	Negative
TCGA-C8-A12M	Negative
TCGA-D8-A1XU	Positive
TCGA-AN-A049	Positive
TCGA-A2-A04V	Positive
TCGA-A2-A0YT	Negative
TCGA-A2-A25B	Positive
TCGA-E9-A54X	Positive
TCGA-GM-A2DM	Positive
TCGA-E2-A14Y	Positive
TCGA-BH-A0DV	Positive
TCGA-LL-A5YP	Negative
TCGA-A8-A085	Positive
TCGA-E2-A15S	Negative
TCGA-D8-A1JT	Positive
TCGA-A2-A0EO	Positive
TCGA-A2-A3KD	Positive
TCGA-A2-A25D	Negative
TCGA-AC-A8OR	Positive
TCGA-S3-A6ZH	Positive
TCGA-C8-A1HM	Positive
TCGA-EW-A1IY	Positive
TCGA-AO-A03O	Positive
TCGA-A7-A5ZX	Positive
TCGA-B6-A0IK	Negative
TCGA-E2-A1B0	Negative
TCGA-EW-A1J2	Positive
TCGA-C8-A1HG	Positive
TCGA-A8-A06O	Positive
TCGA-EW-A1OZ	Negative
TCGA-A2-A0SU	Positive
TCGA-E2-A15F	Positive
TCGA-E2-A109	Negative
TCGA-BH-A0AY	Positive
TCGA-E2-A572	Positive
TCGA-D8-A1X9	Positive
TCGA-A2-A0CV	Positive
TCGA-BH-A1ET	Positive
TCGA-A8-A075	Positive
TCGA-E2-A107	Negative
TCGA-AC-A62Y	Positive
TCGA-B6-A0RI	Positive
TCGA-E2-A15E	Positive
TCGA-A8-A07S	Negative
TCGA-LQ-A4E4	Positive
TCGA-B6-A0IA	Positive
TCGA-A7-A3IY	Positive
TCGA-A8-A0AD	Positive
TCGA-A2-A0YC	Positive
TCGA-BH-A1FG	Positive
TCGA-C8-A12N	Positive
TCGA-A8-A08I	Positive
TCGA-A2-A0YH	Positive
TCGA-D8-A27P	Positive
TCGA-BH-A1EN	Negative
TCGA-LL-A73Z	Positive
TCGA-A2-A4RW	Positive
TCGA-E2-A14T	Positive
TCGA-A2-A0EY	Negative
TCGA-D8-A1XS	Positive
TCGA-D8-A1XL	Positive
TCGA-AR-A254	Positive
TCGA-A2-A0YJ	Negative
TCGA-A1-A0SJ	Positive
TCGA-BH-A1FD	Positive
TCGA-AO-A1KT	Positive
TCGA-AO-A0J8	Positive
TCGA-A2-A0T7	Positive
TCGA-EW-A6SC	Positive
TCGA-BH-A0BP	Positive
TCGA-A2-A4RY	Positive
TCGA-A7-A13H	Positive
TCGA-BH-A0E9	Positive
TCGA-AN-A0XR	Negative
TCGA-AN-A0AK	Negative
TCGA-AR-A1AT	Positive
TCGA-BH-A0BV	Positive
TCGA-D8-A27T	Positive
TCGA-E2-A10B	Positive
TCGA-D8-A27R	Positive
TCGA-C8-A274	Positive
TCGA-A7-A0CD	Positive
TCGA-AC-A23H	Negative
TCGA-B6-A2IU	Positive
TCGA-A8-A086	Positive
TCGA-A8-A07L	Positive
TCGA-A2-A259	Positive
TCGA-AO-A03V	Positive
TCGA-E9-A3Q9	Positive
TCGA-E2-A1L6	Positive
TCGA-BH-A0DQ	Positive
TCGA-A2-A0CS	Positive
TCGA-AN-A0XV	Positive
TCGA-C8-A138	Negative
TCGA-OL-A5RU	Positive
TCGA-EW-A1OY	Positive
TCGA-D8-A27G	Positive
TCGA-A8-A09D	Positive
TCGA-D8-A13Y	Positive
TCGA-BH-A1F5	Positive
TCGA-AC-A5EH	Negative
TCGA-BH-A18U	Positive
TCGA-AR-A0TX	Positive
TCGA-BH-A0DS	Positive
TCGA-D8-A27K	Positive
TCGA-A2-A0EX	Positive
TCGA-E9-A3X8	Positive
TCGA-AR-A0TQ	Negative
TCGA-A8-A08C	Positive
TCGA-D8-A1JK	Positive
TCGA-B6-A409	Negative
TCGA-E2-A10F	Positive
TCGA-D8-A1X7	Positive
TCGA-C8-A132	Positive
TCGA-BH-A1FL	Positive
TCGA-A2-A0CT	Negative
TCGA-D8-A1X5	Positive
TCGA-A2-A3XW	Negative
TCGA-W8-A86G	Positive
TCGA-B6-A0RP	Positive
TCGA-AR-A250	Negative
TCGA-B6-A0RO	Positive
TCGA-D8-A1JD	Positive
TCGA-S3-A6ZF	Positive
TCGA-BH-A0DX	Positive
TCGA-E2-A56Z	Positive
TCGA-BH-A0B0	Positive
TCGA-EW-A6S9	Positive
TCGA-D8-A3Z5	Positive
TCGA-OL-A66O	Positive
TCGA-E2-A15A	Positive
TCGA-A2-A0EW	Positive
TCGA-A8-A07P	Positive
TCGA-BH-A42T	Positive
TCGA-BH-A0DI	Positive
TCGA-A8-A08X	Negative
TCGA-EW-A424	Positive
TCGA-B6-A0X0	Positive
TCGA-A7-A13E	Negative
TCGA-B6-A0X1	Negative
TCGA-D8-A1Y3	Positive
TCGA-E2-A1IG	Positive
TCGA-BH-A0GY	Positive
TCGA-A8-A07B	Positive
TCGA-BH-A1FJ	Positive
TCGA-BH-A0BO	Positive
TCGA-D8-A1XY	Positive
TCGA-BH-A0DH	Positive
TCGA-E2-A570	Positive
TCGA-BH-A0BJ	Positive
TCGA-A8-A092	Positive
TCGA-D8-A1XT	Negative
TCGA-B6-A40B	Positive
TCGA-B6-A0IB	Positive
TCGA-OL-A5S0	Negative
TCGA-A2-A0D3	Positive
TCGA-LD-A74U	Negative
TCGA-LL-A6FQ	Positive
TCGA-E2-A1IO	Positive
TCGA-BH-A0BC	Positive
TCGA-AO-A12E	Positive
TCGA-AO-A0JB	Positive
TCGA-E2-A576	Positive
TCGA-A8-A082	Positive
TCGA-LL-A442	Positive
TCGA-AR-A0TR	Positive
TCGA-A7-A13F	Positive
TCGA-E9-A1N6	Positive
TCGA-AR-A24X	Positive
TCGA-A8-A09Z	Negative
TCGA-BH-A0H3	Positive
TCGA-AN-A0FT	Positive
TCGA-A2-A3XZ	Negative
TCGA-C8-A1HI	Positive
TCGA-C8-A8HP	Negative
TCGA-AO-A0JG	Positive
TCGA-BH-A202	Positive
TCGA-S3-AA12	Negative
TCGA-C8-A137	Negative
TCGA-BH-A0DE	Positive
TCGA-A8-A08A	Positive
TCGA-E2-A10C	Positive
TCGA-D8-A1JE	Positive
TCGA-EW-A6SD	Negative
TCGA-A2-A0YL	Positive
TCGA-BH-A0BR	Positive
TCGA-BH-A0W4	Positive
TCGA-BH-A0BQ	Positive
TCGA-A8-A09V	Positive
TCGA-E2-A1LA	Positive
TCGA-B6-A401	Positive
TCGA-C8-A1HN	Positive
TCGA-BH-A0HK	Negative
TCGA-BH-A0DP	Positive
TCGA-LL-A8F5	Negative
TCGA-A2-A0EU	Positive
TCGA-E2-A2P6	Positive
TCGA-OL-A5RV	Positive
TCGA-A2-A0T4	Positive
TCGA-A2-A0SV	Positive
TCGA-A7-A26H	Negative
TCGA-B6-A1KI	Positive
TCGA-E2-A1IU	Positive
TCGA-AC-A3TM	Positive
TCGA-AO-A0JM	Positive
TCGA-D8-A1JH	Positive
TCGA-B6-A0RM	Positive
TCGA-D8-A1XD	Positive
TCGA-AO-A126	Positive
TCGA-BH-A0DD	Positive
TCGA-BH-A0E1	Positive
TCGA-3C-AALK	Positive
TCGA-LL-A5YN	Positive
TCGA-A7-A13D	Positive
TCGA-BH-A0HB	Positive
TCGA-A7-A3IZ	Negative
TCGA-BH-A1F8	Positive
TCGA-AC-A3EH	Negative
TCGA-AC-A23C	Positive
TCGA-A8-A08L	Negative
TCGA-LL-A6FP	Positive
TCGA-GM-A2DL	Positive
TCGA-EW-A2FR	Negative
TCGA-A8-A084	Negative
TCGA-A2-A04X	Positive
TCGA-E2-A1LE	Negative
TCGA-A8-A083	Positive
TCGA-OL-A5D8	Positive
TCGA-BH-A18P	Negative
TCGA-D8-A1XJ	Positive
TCGA-C8-A26V	Positive
TCGA-A8-A09M	Positive
TCGA-AO-A0J5	Negative
TCGA-BH-A201	Positive
TCGA-BH-A0HU	Positive
TCGA-AO-A12H	Positive
TCGA-AR-A2LN	Positive
TCGA-LD-A7W6	Positive
TCGA-E2-A9RU	Negative
TCGA-B6-A0IM	Positive
TCGA-BH-A0HF	Positive
TCGA-AR-A24N	Positive
TCGA-C8-A1HE	Positive
TCGA-A8-A09K	Positive
TCGA-A8-A07W	Positive
TCGA-BH-A18F	Positive
TCGA-A7-A0D9	Negative
TCGA-E2-A15K	Positive
TCGA-A2-A0CW	Positive
TCGA-BH-A42V	Positive
TCGA-A8-A09T	Positive
TCGA-BH-A0HL	Positive
TCGA-LL-A9Q3	Positive
TCGA-A2-A0YD	Positive
TCGA-AC-A3HN	Positive
TCGA-LL-A5YL	Negative
TCGA-AR-A0TY	Negative
TCGA-A8-A06Z	Positive
TCGA-A2-A0CZ	Positive
TCGA-B6-A0X5	Positive
TCGA-B6-A0IP	Positive
TCGA-BH-AB28	Positive
TCGA-BH-A0B4	Positive
TCGA-C8-A130	Positive
TCGA-C8-A133	Positive
TCGA-AO-A03L	Positive
TCGA-A1-A0SG	Positive
TCGA-B6-A0RN	Negative
TCGA-AR-A0TZ	Positive
TCGA-C8-A12L	Negative
TCGA-C8-A3M8	Positive
TCGA-EW-A2FS	Negative
TCGA-AR-A5QP	Positive
TCGA-BH-A0B8	Positive
TCGA-EW-A1PD	Positive
TCGA-AC-A7VC	Negative
TCGA-GM-A2D9	Positive
TCGA-BH-A0B5	Positive
TCGA-EW-A6SA	Negative
TCGA-A8-A09Q	Positive
TCGA-BH-A0AZ	Positive
TCGA-BH-A1FR	Positive
TCGA-E2-A14O	Positive
TCGA-AO-A0J7	Positive
TCGA-AN-A0AM	Negative
TCGA-E2-A1II	Positive
TCGA-GI-A2C8	Positive
TCGA-AR-A24R	Positive
TCGA-A7-A26E	Positive
TCGA-B6-A1KC	Negative
TCGA-E2-A15K	Positive
TCGA-D8-A1JM	Negative
TCGA-BH-A18M	Positive
TCGA-A8-A099	Positive
TCGA-E2-A14P	Negative
TCGA-BH-A5IZ	Negative
TCGA-AN-A0XP	Positive
TCGA-A2-A0D1	Negative
TCGA-A2-A0YF	Negative
TCGA-A8-A094	Negative
TCGA-A7-A26J	Positive
TCGA-AR-A24K	Positive
TCGA-AO-A1KQ	Positive
TCGA-A8-A0AB	Positive
TCGA-A2-A1FV	Positive
TCGA-A1-A0SE	Positive
TCGA-A8-A095	Positive
TCGA-D8-A1Y1	Positive
TCGA-AR-A24L	Positive
TCGA-EW-A1IX	Positive
TCGA-A2-A0T5	Positive
TCGA-EW-A2FW	Positive
TCGA-D8-A1XB	Positive
TCGA-D8-A27V	Positive
TCGA-S3-AA14	Positive
TCGA-D8-A1XM	Positive
TCGA-C8-A12Q	Negative
TCGA-AR-A2LO	Positive
TCGA-A8-A09B	Positive
TCGA-AR-A1AK	Positive
TCGA-E2-A15E	Positive
TCGA-E2-A1IK	Positive
TCGA-AC-A62X	Negative
TCGA-GM-A2DK	Negative
TCGA-S3-A6ZG	Positive
TCGA-E2-A155	Negative
TCGA-OL-A66K	Positive
TCGA-A1-A0SM	Negative
TCGA-HN-A2OB	Positive
TCGA-A8-A08Z	Positive
TCGA-D8-A1XO	Positive
TCGA-AO-A03T	Positive
TCGA-A7-A4SC	Negative
TCGA-BH-A0DO	Positive
TCGA-A8-A08F	Positive
TCGA-E2-A1IN	Positive
TCGA-E9-A227	Positive
TCGA-A2-A04R	Positive
TCGA-A8-A081	Positive
TCGA-AN-A0FZ	Negative
TCGA-BH-A1FH	Negative
TCGA-AC-A3W7	Negative
TCGA-GM-A2DC	Positive
TCGA-D8-A1XG	Negative
TCGA-4H-AAAK	Positive
TCGA-OL-A5RX	Positive
TCGA-AO-A12B	Positive
TCGA-BH-A0HO	Positive
TCGA-E9-A6HE	Positive
TCGA-E2-A15O	Positive
TCGA-E2-A1LB	Negative
TCGA-A8-A08S	Positive
TCGA-AN-A0FY	Positive
TCGA-A8-A06R	Negative
TCGA-D8-A1JI	Positive
TCGA-A7-A26J	Positive
TCGA-E2-A15I	Positive
TCGA-A2-A0D4	Positive
TCGA-LD-A66U	Positive
TCGA-B6-A0IJ	Positive
TCGA-D8-A146	Positive
TCGA-B6-A0I5	Positive
TCGA-A2-A3KC	Positive
TCGA-E2-A14W	Positive
TCGA-GM-A3XN	Positive
TCGA-E9-A1N9	Positive
TCGA-A7-A3J0	Positive
TCGA-BH-A0DZ	Positive
TCGA-BH-A0B1	Positive
TCGA-EW-A1PE	Positive
TCGA-BH-A0HY	Negative
TCGA-AO-A0JF	Positive
TCGA-AO-A03P	Positive
TCGA-A2-A4S0	Positive
TCGA-EW-A1P6	Positive
TCGA-BH-A0BA	Positive
TCGA-UU-A93S	Negative
TCGA-A8-A07F	Positive
TCGA-E2-A15J	Positive
TCGA-E2-A1IF	Positive
TCGA-A2-A0YG	Positive
TCGA-GM-A3XG	Positive
TCGA-A2-A0EM	Positive
TCGA-A7-A4SF	Negative
TCGA-AR-A24T	Positive
TCGA-AO-A1KO	Positive
TCGA-BH-A0HA	Positive
TCGA-A8-A06U	Positive
TCGA-A8-A0A9	Positive
TCGA-A2-A1FZ	Positive
TCGA-E2-A1IL	Positive
TCGA-EW-A2FV	Positive
TCGA-OK-A5Q2	Positive
TCGA-BH-A1FN	Positive
TCGA-BH-A1FE	Positive
TCGA-AC-A6IX	Positive
TCGA-BH-A0C0	Positive
TCGA-A1-A0SH	Positive
TCGA-AR-A2LQ	Positive
TCGA-AC-A5XS	Positive
TCGA-AR-A1AN	Positive
TCGA-AR-A0TV	Positive
TCGA-WT-AB41	Positive
TCGA-AC-A2FO	Negative
TCGA-A8-A09I	Positive
TCGA-GM-A5PX	Positive
TCGA-BH-A1EV	Positive
TCGA-E2-A1L9	Positive
TCGA-B6-A0I9	Positive
TCGA-BH-A0C7	Negative
TCGA-A8-A07G	Positive
TCGA-D8-A1XR	Positive
TCGA-AC-A8OP	Positive
TCGA-AC-A3TN	Positive
TCGA-A7-A3J1	Positive
TCGA-BH-A6R8	Positive
TCGA-A8-A08J	Negative
TCGA-E2-A106	Positive
TCGA-AN-A041	Negative
TCGA-AR-A5QM	Positive
TCGA-A2-A0EV	Positive
TCGA-D8-A1JP	Positive
TCGA-BH-A1ES	Positive
TCGA-A7-A0DB	Positive
TCGA-EW-A1PA	Positive
TCGA-AR-A1AS	Positive
TCGA-MS-A51U	Positive
TCGA-A2-A1G0	Positive
TCGA-EW-A6SB	Negative
TCGA-LL-A6FR	Positive
TCGA-AC-A8OS	Positive
TCGA-BH-A18N	Positive
TCGA-E2-A105	Positive
TCGA-AR-A2LM	Positive
TCGA-C8-A27A	Positive
TCGA-A8-A07E	Positive
TCGA-GM-A3NW	Positive
TCGA-A2-A4S2	Positive
TCGA-A8-A07Z	Positive
TCGA-B6-A0WZ	Positive
TCGA-EW-A1P0	Negative
TCGA-E2-A15L	Positive
TCGA-B6-A0IC	Positive
TCGA-C8-A1HF	Positive
TCGA-S3-AA11	Positive
TCGA-BH-A18I	Positive
TCGA-Z7-A8R6	Positive
TCGA-BH-A18S	Positive
TCGA-AO-A1KP	Positive
TCGA-AN-A046	Positive
TCGA-AN-A0XO	Negative
TCGA-AQ-A1H2	Positive
TCGA-BH-A0DT	Positive
TCGA-AC-A3YI	Positive
TCGA-A7-A26E	Positive
TCGA-AO-A03N	Positive
TCGA-B6-A0WS	Positive
TCGA-A8-A06T	Positive
TCGA-A1-A0SI	Positive
TCGA-BH-A0H0	Positive
TCGA-C8-A8HQ	Positive
TCGA-OL-A66N	Negative
TCGA-A1-A0SF	Positive
TCGA-B6-A40C	Positive
TCGA-OL-A66L	Positive
TCGA-B6-A0RL	Positive
TCGA-E2-A15A	Positive
TCGA-D8-A1J9	Negative
TCGA-A8-A08T	Positive
TCGA-E2-A1BC	Positive
TCGA-BH-A0HN	Positive
TCGA-A2-A4S3	Positive
TCGA-A2-A0CK	Positive
TCGA-A8-A0A2	Positive
TCGA-B6-A0X7	Positive
TCGA-E2-A15G	Positive
TCGA-OL-A66H	Positive
TCGA-D8-A1JC	Positive
TCGA-A8-A097	Positive
TCGA-A8-A079	Positive
TCGA-BH-A0DL	Negative
TCGA-AN-A0XS	Positive
TCGA-B6-A0WT	Positive
TCGA-AO-A0JL	Negative
TCGA-A2-A25E	Positive
TCGA-D8-A1XC	Positive
TCGA-B6-A0IG	Positive
TCGA-A8-A08B	Negative
TCGA-C8-A12W	Positive
TCGA-A7-A0CJ	Positive
TCGA-E2-A14V	Positive
TCGA-AR-A255	Positive
TCGA-A8-A08O	Positive
TCGA-AQ-A54O	Positive
TCGA-AR-A24Z	Positive
TCGA-AC-A6IX	Positive
TCGA-BH-A0HQ	Positive
TCGA-D8-A1JA	Negative
TCGA-AN-A04A	Positive
TCGA-AC-A3YJ	Positive
TCGA-EW-A1J1	Positive
TCGA-C8-A1HK	Negative
TCGA-AC-A3QP	Positive
TCGA-BH-A0HI	Positive
TCGA-BH-A28Q	Positive
TCGA-EW-A3E8	Negative
TCGA-E9-A1N4	Positive
TCGA-B6-A0WV	Positive
TCGA-EW-A1PF	Positive
TCGA-E2-A15H	Positive
TCGA-E9-A1NC	Positive
TCGA-A8-A0A4	Positive
TCGA-A2-A0CP	Positive
TCGA-A8-A06P	Positive
TCGA-AC-A2FG	Negative
TCGA-E2-A15P	Positive
TCGA-A8-A06N	Negative
TCGA-PE-A5DD	Negative
TCGA-D8-A1XZ	Negative
TCGA-A2-A0ER	Positive
TCGA-BH-A1EX	Positive
TCGA-C8-A12T	Positive
TCGA-5T-A9QA	Negative
TCGA-E9-A1NI	Positive
TCGA-A7-A5ZW	Positive
TCGA-A8-A06Y	Positive
TCGA-EW-A1J6	Positive
TCGA-B6-A0RQ	Positive
TCGA-GM-A3NY	Positive
TCGA-BH-A0EA	Positive
TCGA-C8-A12Z	Negative
TCGA-BH-A0H7	Positive
TCGA-C8-A12P	Negative
TCGA-D8-A1X6	Positive
TCGA-E9-A1NH	Positive
TCGA-BH-A8FY	Positive
TCGA-AR-A24W	Positive
TCGA-BH-A0AU	Positive
TCGA-BH-A0E7	Positive
TCGA-AR-A1AU	Positive
TCGA-AO-A03M	Positive
TCGA-D8-A1JB	Positive
TCGA-D8-A27L	Positive
TCGA-A7-A426	Positive
TCGA-BH-A1FU	Negative
TCGA-A2-A0CQ	Positive
TCGA-A8-A09G	Negative
TCGA-C8-A12X	Positive
TCGA-A2-A04W	Negative
TCGA-BH-A1ES	Positive
TCGA-OL-A6VR	Positive
TCGA-B6-A0RG	Negative
TCGA-A7-A0CG	Negative
TCGA-A2-A1FX	Positive
TCGA-LL-A50Y	Positive
TCGA-B6-A0X4	Positive
TCGA-B6-A0IH	Positive
TCGA-AN-A0XT	Negative
TCGA-A1-A0SQ	Positive
TCGA-BH-A0EI	Positive
TCGA-D8-A27N	Positive
TCGA-3C-AALJ	Positive
TCGA-EW-A1OX	Positive
TCGA-BH-A18L	Positive
TCGA-BH-A0BM	Negative
TCGA-EW-A1P3	Positive
TCGA-AC-A6NO	Positive
TCGA-A2-A04N	Positive
TCGA-E9-A295	Positive
TCGA-A8-A09R	Positive
TCGA-A2-A0CU	Positive
TCGA-A8-A093	Positive
TCGA-BH-A18R	Negative
TCGA-D8-A1XF	Positive
TCGA-D8-A140	Positive
TCGA-AR-A24H	Positive
TCGA-C8-A12U	Positive
TCGA-E9-A22H	Positive
TCGA-OL-A5RZ	Negative
TCGA-AO-A0JD	Positive
TCGA-EW-A1P5	Positive
TCGA-A8-A076	Positive
TCGA-E2-A14Z	Positive
TCGA-A2-A25C	Positive
TCGA-A2-A3XV	Negative
TCGA-S3-AA0Z	Positive
TCGA-BH-A0BT	Positive
TCGA-AR-A2LE	Negative
TCGA-C8-A26W	Positive
TCGA-AN-A0FD	Positive
TCGA-A2-A4RX	Positive
TCGA-A2-A0T3	Positive
TCGA-E2-A15D	Positive
TCGA-BH-A28O	Positive
TCGA-E9-A1NA	Positive
TCGA-E2-A15T	Positive
TCGA-BH-A0C3	Negative
TCGA-A2-A0ES	Positive
TCGA-EW-A423	Positive
TCGA-AR-A24P	Positive
TCGA-C8-A12O	Positive
TCGA-D8-A1JN	Positive
TCGA-AQ-A1H3	Positive
TCGA-GM-A2DN	Positive
TCGA-D8-A1J8	Positive
TCGA-E2-A10E	Positive
TCGA-AQ-A04L	Negative
TCGA-AO-A0JA	Positive
TCGA-C8-A26Z	Positive
TCGA-D8-A3Z6	Positive
TCGA-BH-A0EE	Negative
TCGA-C8-A1HO	Positive
TCGA-AO-A0J3	Positive
TCGA-E2-A1IE	Positive
TCGA-A2-A0CX	Negative
TCGA-AN-A0FF	Positive
TCGA-AC-A2QI	Negative
TCGA-A2-A1FW	Negative
TCGA-D8-A1XA	Positive
TCGA-B6-A0I1	Negative
TCGA-E2-A153	Positive
TCGA-BH-A1FE	Positive
TCGA-Z7-A8R5	Positive
TCGA-BH-A0GZ	Positive
TCGA-AR-A1AP	Positive
TCGA-B6-A0IN	Negative
TCGA-UL-AAZ6	Positive
TCGA-AO-A12G	Positive
TCGA-LL-A7T0	Positive
TCGA-3C-AAAU	Positive
TCGA-AN-A03Y	Positive
TCGA-A8-A09A	Positive
TCGA-A2-A25A	Positive
TCGA-EW-A1PH	Negative
TCGA-BH-A42U	Negative
TCGA-B6-A0WX	Negative
TCGA-A7-A6VV	Negative
TCGA-BH-A0B9	Negative
TCGA-A2-A3XS	Negative
TCGA-A8-A07R	Negative
TCGA-AN-A0AT	Negative
TCGA-A2-A04P	Negative
TCGA-A2-A3XX	Negative
TCGA-A1-A0SP	Negative
TCGA-AO-A1KR	Negative
TCGA-E2-A1LG	Negative
TCGA-AQ-A04J	Negative
TCGA-C8-A134	Negative
TCGA-AR-A0TP	Negative
TCGA-A2-A0T0	Negative
TCGA-LL-A740	Negative
TCGA-A2-A3XY	Negative
TCGA-BH-A0BG	Negative
TCGA-C8-A26Y	Negative
TCGA-BH-A0BW	Negative
TCGA-AO-A0J2	Negative
TCGA-AR-A1AH	Negative
TCGA-A2-A1G6	Negative
TCGA-A8-A08R	Negative
TCGA-B6-A0IE	Negative
TCGA-AR-A256	Negative
TCGA-C8-A27B	Negative
TCGA-A2-A04U	Negative
TCGA-LL-A73Y	Negative
TCGA-A2-A0CM	Negative
TCGA-BH-A0WA	Negative
TCGA-A1-A0SO	Negative
TCGA-A7-A0CE	Negative
TCGA-EW-A1P8	Negative
TCGA-AR-A5QQ	Negative
TCGA-D8-A27H	Negative
TCGA-D8-A1XK	Negative
TCGA-A2-A0SX	Negative
TCGA-AO-A0J6	Negative
TCGA-EW-A1OW	Negative
TCGA-GI-A2C9	Negative
TCGA-AN-A0FL	Negative
TCGA-AR-A2LH	Negative
TCGA-D8-A1JF	Negative
TCGA-E2-A1L7	Negative
TCGA-GM-A2DH	Negative
TCGA-A7-A5ZV	Negative
TCGA-A7-A6VW	Negative
TCGA-AO-A129	Negative
TCGA-B6-A0I6	Negative
TCGA-A7-A6VY	Negative
TCGA-D8-A1XQ	Negative
TCGA-A7-A0DA	Negative
TCGA-C8-A3M7	Negative
TCGA-E2-A1LL	Negative
TCGA-E2-A573	Negative
TCGA-C8-A1HJ	Negative
TCGA-AN-A0XU	Negative
TCGA-BH-A18Q	Negative
TCGA-GM-A2DF	Negative
TCGA-BH-A1F6	Negative
TCGA-A1-A0SK	Negative
TCGA-AR-A0U0	Negative
TCGA-E2-A1AZ	Negative
TCGA-AC-A2BK	Negative
TCGA-D8-A27F	Negative
TCGA-OL-A5D7	Negative
TCGA-A2-A0D2	Negative
TCGA-BH-A0E0	Negative
TCGA-E2-A1LS	Negative
TCGA-A8-A07C	Negative
TCGA-BH-A18V	Negative
TCGA-A2-A04T	Negative
TCGA-AC-A8OQ	Negative
TCGA-D8-A147	Negative
TCGA-E2-A14N	Negative
TCGA-E2-A150	Negative
TCGA-AN-A0G0	Negative
TCGA-AR-A1AY	Negative
TCGA-AR-A1AI	Negative
TCGA-BH-A0B3	Negative
TCGA-B6-A0RS	Negative
TCGA-A8-A07O	Negative
TCGA-E9-A5FL	Negative
TCGA-A7-A4SD	Negative
TCGA-AC-A6IW	Negative
TCGA-S3-AA10	Negative
TCGA-AR-A2LR	Negative
TCGA-AR-A1AQ	Negative
TCGA-A2-A3XT	Negative
TCGA-D8-A1JL	Negative
TCGA-OL-A97C	Negative
TCGA-BH-A1FC	Negative
TCGA-B6-A402	Negative
TCGA-GM-A3XL	Negative
TCGA-A2-A3XU	Negative
TCGA-AO-A124	Negative
TCGA-BH-A0AV	Negative
TCGA-AN-A0AL	Negative
TCGA-OL-A5D6	Negative
TCGA-BH-A0E6	Negative
TCGA-LL-A441	Negative
TCGA-HN-A2NL	Negative
TCGA-E2-A159	Negative
TCGA-E2-A158	Negative
TCGA-AO-A0J4	Negative
TCGA-EW-A1P4	Negative
TCGA-AN-A0FJ	Negative
TCGA-D8-A143	Negative
TCGA-E2-A1LI	Negative
TCGA-A7-A4SE	Negative
TCGA-C8-A131	Negative
TCGA-GM-A2DB	Negative
TCGA-AQ-A54N	Negative
TCGA-BH-A1EW	Negative
TCGA-AN-A0AR	Negative
TCGA-A2-A0T2	Negative
TCGA-D8-A142	Negative
TCGA-E2-A14R	Negative
TCGA-A2-A0YE	Negative
TCGA-D8-A1JG	Negative
TCGA-B6-A0RU	Negative
TCGA-AO-A12F	Negative
TCGA-AR-A0TU	Negative
TCGA-A2-A0YM	Negative
TCGA-D8-A13Z	Negative
TCGA-E2-A574	Negative
TCGA-E2-A1LK	Negative
TCGA-AN-A04D	Negative
TCGA-OL-A6VO	Negative
TCGA-BH-A18G	Negative
TCGA-E9-A22G	Negative
TCGA-A2-A0EQ	Negative
TCGA-OL-A5RW	Negative
TCGA-BH-A18V	Negative
TCGA-A2-A0D0	Negative
TCGA-EW-A1PB	Negative
TCGA-AN-A0FX	Negative
TCGA-B6-A0IQ	Negative
TCGA-B6-A0RE	Negative
TCGA-BH-A18T	Negative
